# Supplementary material for: Machine Learning-Based Identifications of COVID-19 Fake News Using Biomedical Information Extraction
Source: MDPI journal article supplement (doi:10.3390/bdcc7010046), 2023-03-07
Supplement: s1 [file s1]

**Table S7: Accuracies of the 15 machine learning configurations on the testing set.**

|                            | SciSpaCy | MetaMap | Custom | Combine1 | Combine2 | Combine3 | All   |
|----------------------------|----------|---------|--------|----------|----------|----------|-------|
| <b>Logistic regression</b> | 0.677    | 0.743   | 0.608  | 0.75     | 0.653    | 0.76     | 0.764 |
| <b>AdaBoost</b>            | 0.635    | 0.753   | 0.608  | 0.781    | 0.681    | 0.767    | 0.781 |
| <b>Bagging</b>             | 0.639    | 0.736   | 0.622  | 0.767    | 0.66     | 0.767    | 0.767 |
| <b>Decision tree</b>       | 0.604    | 0.674   | 0.597  | 0.674    | 0.59     | 0.677    | 0.684 |
| <b>SVC_rbf</b>             | 0.656    | 0.733   | 0.618  | 0.722    | 0.656    | 0.722    | 0.722 |
| <b>SVC_poly</b>            | 0.604    | 0.625   | 0.556  | 0.615    | 0.604    | 0.625    | 0.615 |
| <b>SVC_sigmoid</b>         | 0.594    | 0.639   | 0.556  | 0.649    | 0.594    | 0.656    | 0.656 |
| <b>kNN</b>                 | 0.615    | 0.715   | 0.601  | 0.719    | 0.642    | 0.712    | 0.715 |
| <b>Naïve bayes</b>         | 0.59     | 0.594   | 0.601  | 0.604    | 0.59     | 0.594    | 0.604 |
| <b>Random forest</b>       | 0.684    | 0.795   | 0.618  | 0.778    | 0.698    | 0.781    | 0.788 |
| <b>SGDClassifier_L1</b>    | 0.583    | 0.747   | 0.594  | 0.726    | 0.611    | 0.757    | 0.715 |
| <b>SGDClassifier_L2</b>    | 0.569    | 0.76    | 0.503  | 0.75     | 0.566    | 0.74     | 0.747 |
| <b>SGDClassifier_EN</b>    | 0.576    | 0.753   | 0.601  | 0.733    | 0.58     | 0.747    | 0.743 |
| <b>LinearSVC_L1</b>        | 0.667    | 0.743   | 0.601  | 0.733    | 0.663    | 0.743    | 0.736 |
| <b>LinearSVC_L2</b>        | 0.667    | 0.743   | 0.601  | 0.736    | 0.663    | 0.747    | 0.74  |

AdaBoost: Adaptive Boosting; Bagging: Bootstrap aggregating; SVC\_rbf or \_poly or \_sigmoid: support vector machine with rbf kernel or polynomial kernel or sigmoid kernel;

SGDClassifier\_L1 or \_L2 or \_EN: stochastic gradient descent with L1 or L2 or Elastic Net regularization; NN: k-Nearest Neighbors; LinearSVC\_L1 or \_L2: support vector machine with linear kernel coupled with L1 or L2 regularization

Sci: features extracted by scispaCy; Meta: features extracted by MetaMap; Custom: features extracted by the spaCy customized model; Combine1: features extracted by scispaCy or MetaMap; Combine2: features extracted by scispaCy or the spaCy customized model; Combine3: features extracted by MetaMap or the spaCy customized model; All: features extracted by scispaCy, MetaMap, or the spaCy customized model.

**Table S8: F1 scores of the 15 machine learning configurations on the testing set.**

|                            | SciSpaCy | MetaMap | Custom | Combine1 | Combine2 | Combine3 | All   |
|----------------------------|----------|---------|--------|----------|----------|----------|-------|
| <b>Logistic regression</b> | 0.710    | 0.752   | 0.664  | 0.821    | 0.693    | 0.772    | 0.772 |
| <b>AdaBoost</b>            | 0.714    | 0.751   | 0.62   | 0.774    | 0.685    | 0.765    | 0.774 |
| <b>Bagging</b>             | 0.645    | 0.741   | 0.64   | 0.783    | 0.68     | 0.779    | 0.776 |
| <b>Decision tree</b>       | 0.601    | 0.674   | 0.613  | 0.693    | 0.614    | 0.674    | 0.698 |
| <b>SVC_rbf</b>             | 0.706    | 0.72    | 0.663  | 0.704    | 0.71     | 0.712    | 0.71  |
| <b>SVC_poly</b>            | 0.715    | 0.729   | 0.692  | 0.722    | 0.718    | 0.729    | 0.722 |
| <b>SVC_sigmoid</b>         | 0.651    | 0.658   | 0.573  | 0.664    | 0.653    | 0.673    | 0.673 |
| <b>kNN</b>                 | 0.613    | 0.723   | 0.628  | 0.720    | 0.633    | 0.724    | 0.73  |
| <b>Naïve bayes</b>         | 0.699    | 0.693   | 0.674  | 0.702    | 0.697    | 0.693    | 0.712 |
| <b>Random forest</b>       | 0.681    | 0.794   | 0.638  | 0.778    | 0.695    | 0.780    | 0.786 |
| <b>SGDClassifier_L1</b>    | 0.618    | 0.767   | 0.679  | 0.73     | 0.654    | 0.764    | 0.723 |
| <b>SGDClassifier_L2</b>    | 0.584    | 0.751   | 0.665  | 0.755    | 0.542    | 0.719    | 0.731 |
| <b>SGDClassifier_EN</b>    | 0.639    | 0.756   | 0.685  | 0.734    | 0.623    | 0.759    | 0.748 |

|                     |       |       |       |       |       |       |       |
|---------------------|-------|-------|-------|-------|-------|-------|-------|
| <b>LinearSVC_L1</b> | 0.702 | 0.748 | 0.657 | 0.741 | 0.705 | 0.752 | 0.750 |
| <b>LinearSVC_L2</b> | 0.702 | 0.748 | 0.657 | 0.744 | 0.705 | 0.756 | 0.750 |

AdaBoost: Adaptive Boosting; Bagging: Bootstrap aggregating; SVC\_rbf or \_poly or \_sigmoid: support vector machine with rbf kernel or polynomial kernel or sigmoid kernel; SGDClassifier\_L1 or \_L2 or \_EN: stochastic gradient descent with L1 or L2 or Elastic Net regularization; NN: k-Nearest Neighbors; LinearSVC\_L1 or \_L2: support vector machine with linear kernel coupled with L1 or L2 regularization

Sci: features extracted by scispaCy; Meta: features extracted by MetaMap; Custom: features extracted by the spaCy customized model; Combine1: features extracted by scispaCy or MetaMap; Combine2: features extracted by scispaCy or the spaCy customized model; Combine3: features extracted by MetaMap or the spaCy customized model; All: features extracted by scispaCy, MetaMap, or the spaCy customized model.

**Table S9: Recalls of the 15 machine learning configurations on the testing set.**

|                            | SciSpaCy | MetaMap | Custom | Combine1 | Combine2 | Combine3 | All   |
|----------------------------|----------|---------|--------|----------|----------|----------|-------|
| <b>Logistic regression</b> | 0.760    | 0.747   | 0.747  | 0.747    | 0.753    | 0.780    | 0.767 |
| <b>AdaBoost</b>            | 0.647    | 0.713   | 0.649  | 0.72     | 0.667    | 0.727    | 0.72  |
| <b>Bagging</b>             | 0.640    | 0.727   | 0.647  | 0.807    | 0.693    | 0.787    | 0.773 |
| <b>Decision tree</b>       | 0.573    | 0.647   | 0.613  | 0.707    | 0.627    | 0.640    | 0.700 |
| <b>SVC_rbf</b>             | 0.793    | 0.660   | 0.720  | 0.633    | 0.707    | 0.660    | 0.653 |
| <b>SVC_poly</b>            | 0.953    | 0.967   | 0.960  | 0.960    | 0.967    | 0.967    | 0.96  |
| <b>SVC_sigmoid</b>         | 0.727    | 0.667   | 0.573  | 0.667    | 0.733    | 0.68     | 0.673 |
| <b>kNN</b>                 | 0.587    | 0.713   | 0.647  | 0.693    | 0.593    | 0.727    | 0.740 |
| <b>Naïve bayes</b>         | 0.913    | 0.880   | 0.793  | 0.893    | 0.907    | 0.880    | 0.893 |
| <b>Random forest</b>       | 0.647    | 0.760   | 0.647  | 0.747    | 0.660    | 0.747    | 0.747 |

|                         |       |       |       |       |       |       |       |
|-------------------------|-------|-------|-------|-------|-------|-------|-------|
| <b>SGDClassifier_L1</b> | 0.669 | 0.828 | 0.855 | 0.738 | 0.731 | 0.779 | 0.738 |
| <b>SGDClassifier_L2</b> | 0.600 | 0.717 | 0.979 | 0.765 | 0.510 | 0.662 | 0.683 |
| <b>SGDClassifier_EN</b> | 0.745 | 0.759 | 0.862 | 0.731 | 0.690 | 0.793 | 0.759 |
| <b>LinearSVC_L1</b>     | 0.753 | 0.733 | 0.733 | 0.733 | 0.733 | 0.747 | 0.760 |
| <b>LinearSVC_L2</b>     | 0.753 | 0.733 | 0.733 | 0.74  | 0.773 | 0.753 | 0.760 |

AdaBoost: Adaptive Boosting; Bagging: Bootstrap aggregating; SVC\_rbf or \_poly or \_sigmoid: support vector machine with rbf kernel or polynomial kernel or sigmoid kernel;

SGDClassifier\_L1 or \_L2 or \_EN: stochastic gradient descent with L1 or L2 or Elastic Net regularization; NN: k-Nearest Neighbors; LinearSVC\_L1 or \_L2: support vector machine with linear kernel coupled with L1 or L2 regularization

Sci: features extracted by scispaCy; Meta: features extracted by MetaMap; Custom: features extracted by the spaCy customized model; Combine1: features extracted by scispaCy or MetaMap; Combine2: features extracted by scispaCy or the spaCy customized model; Combine3: features extracted by MetaMap or the spaCy customized model; All: features extracted by scispaCy, MetaMap, or the spaCy customized model.

**Table S10: Specificities of the 15 machine learning configurations on the testing set.**

|                            | SciSpaCy | MetaMap | Custom | Combine1 | Combine2 | Combine3 | All   |
|----------------------------|----------|---------|--------|----------|----------|----------|-------|
| <b>Logistic regression</b> | 0.678    | 0.729   | 0.624  | 0.732    | 0.684    | 0.756    | 0.75  |
| <b>AdaBoost</b>            | 0.644    | 0.754   | 0.583  | 0.745    | 0.646    | 0.732    | 0.736 |
| <b>Bagging</b>             | 0.674    | 0.769   | 0.603  | 0.75     | 0.655    | 0.752    | 0.74  |
| <b>Decision tree</b>       | 0.579    | 0.647   | 0.612  | 0.648    | 0.576    | 0.643    | 0.672 |
| <b>SVC_rbf</b>             | 0.646    | 0.713   | 0.61   | 0.673    | 0.701    | 0.716    | 0.679 |
| <b>SVC_poly</b>            | 0.842    | 0.875   | 0.767  | 0.846    | 0.829    | 0.875    | 0.846 |
| <b>SVC_sigmoid</b>         | 0.690    | 0.817   | 0.536  | 0.808    | 0.717    | 0.819    | 0.836 |

|                         |       |       |       |       |       |       |       |
|-------------------------|-------|-------|-------|-------|-------|-------|-------|
| <b>kNN</b>              | 0.618 | 0.711 | 0.589 | 0.686 | 0.622 | 0.712 | 0.745 |
| <b>Naïve bayes</b>      | 0.793 | 0.684 | 0.615 | 0.714 | 0.75  | 0.684 | 0.714 |
| <b>Random forest</b>    | 0.642 | 0.762 | 0.617 | 0.747 | 0.667 | 0.755 | 0.774 |
| <b>SGDClassifier_L1</b> | 0.709 | 0.692 | 0.521 | 0.685 | 0.694 | 0.696 | 0.697 |
| <b>SGDClassifier_L2</b> | 0.709 | 0.692 | 0.521 | 0.711 | 0.608 | 0.696 | 0.697 |
| <b>SGDClassifier_EN</b> | 0.577 | 0.727 | 0.521 | 0.685 | 0.679 | 0.707 | 0.697 |
| <b>LinearSVC_L1</b>     | 0.684 | 0.722 | 0.624 | 0.725 | 0.688 | 0.734 | 0.737 |
| <b>LinearSVC_L2</b>     | 0.681 | 0.722 | 0.612 | 0.721 | 0.688 | 0.734 | 0.733 |

AdaBoost: Adaptive Boosting; Bagging: Bootstrap aggregating; SVC\_rbf or \_poly or \_sigmoid: support vector machine with rbf kernel or polynomial kernel or sigmoid kernel;

SGDClassifier\_L1 or \_L2 or \_EN: stochastic gradient descent with L1 or L2 or Elastic Net regularization; NN: k-Nearest Neighbors; LinearSVC\_L1 or \_L2: support vector machine with linear kernel coupled with L1 or L2 regularization

Sci: features extracted by scispaCy; Meta: features extracted by MetaMap; Custom: features extracted by the spaCy customized model; Combine1: features extracted by scispaCy or MetaMap; Combine2: features extracted by scispaCy or the spaCy customized model; Combine3: features extracted by MetaMap or the spaCy customized model; All: features extracted by scispaCy, MetaMap, or the spaCy customized model.

**Table S11: Precisions of the 15 machine learning configurations on the testing set.**

|                            | SciSpaCy | MetaMap | Custom | Combine1 | Combine2 | Combine3 | All   |
|----------------------------|----------|---------|--------|----------|----------|----------|-------|
| <b>Logistic regression</b> | 0.667    | 0.757   | 0.599  | 0.767    | 0.642    | 0.78     | 0.777 |
| <b>AdaBoost</b>            | 0.651    | 0.793   | 0.626  | 0.837    | 0.704    | 0.807    | 0.837 |
| <b>Bagging</b>             | 0.658    | 0.757   | 0.634  | 0.761    | 0.667    | 0.771    | 0.779 |
| <b>Decision tree</b>       | 0.633    | 0.703   | 0.613  | 0.679    | 0.603    | 0.711    | 0.695 |

|                         |       |       |       |       |       |       |       |
|-------------------------|-------|-------|-------|-------|-------|-------|-------|
| <b>SVC_rbf</b>          | 0.636 | 0.792 | 0.614 | 0.792 | 0.634 | 0.773 | 0.778 |
| <b>SVC_poly</b>         | 0.572 | 0.585 | 0.541 | 0.578 | 0.571 | 0.585 | 0.578 |
| <b>SVC_sigmoid</b>      | 0.589 | 0.649 | 0.573 | 0.662 | 0.588 | 0.667 | 0.669 |
| <b>kNN</b>              | 0.642 | 0.732 | 0.61  | 0.748 | 0.679 | 0.722 | 0.721 |
| <b>Naïve bayes</b>      | 0.566 | 0.572 | 0.586 | 0.578 | 0.567 | 0.571 | 0.578 |
| <b>Random forest</b>    | 0.719 | 0.832 | 0.63  | 0.812 | 0.733 | 0.818 | 0.829 |
| <b>SGDClassifier_L1</b> | 0.574 | 0.714 | 0.564 | 0.723 | 0.592 | 0.748 | 0.709 |
| <b>SGDClassifier_L2</b> | 0.569 | 0.788 | 0.503 | 0.745 | 0.578 | 0.787 | 0.786 |
| <b>SGDClassifier_EN</b> | 0.560 | 0.753 | 0.568 | 0.736 | 0.568 | 0.728 | 0.738 |
| <b>LinearSVC_L1</b>     | 0.657 | 0.764 | 0.595 | 0.748 | 0.648 | 0.757 | 0.74  |
| <b>LinearSVC_L2</b>     | 0.657 | 0.764 | 0.595 | 0.75  | 0.648 | 0.758 | 0.745 |

AdaBoost: Adaptive Boosting; Bagging: Bootstrap aggregating; SVC\_rbf or \_poly or \_sigmoid: support vector machine with rbf kernel or polynomial kernel or sigmoid kernel; SGDClassifier\_L1 or \_L2 or \_EN: stochastic gradient descent with L1 or L2 or Elastic Net regularization; NN: k-Nearest Neighbors; LinearSVC\_L1 or \_L2: support vector machine with linear kernel coupled with L1 or L2 regularization

Sci: features extracted by scispaCy; Meta: features extracted by MetaMap; Custom: features extracted by the spaCy customized model; Combine1: features extracted by scispaCy or MetaMap; Combine2: features extracted by scispaCy or the spaCy customized model; Combine3: features extracted by MetaMap or the spaCy customized model; All: features extracted by scispaCy, MetaMap, or the spaCy customized model.
