# Supplementary material for: Machine Learning-Based Identifications of COVID-19 Fake News Using Biomedical Information Extraction
Source: MDPI journal article supplement (doi:10.3390/bdcc7010046), 2023-03-07
Supplement: s1 [file s1]

**Table S1. Biomedical information extraction-based features extracted by scispaCy.**

| <b>Features</b>                          | <b>Models</b> |
|------------------------------------------|---------------|
| Entrez Gene and Protein Ontology         | craft         |
| Sequence Ontology                        | craft         |
| NCBI Taxonomy                            | craft         |
| Chemical Entities of Biological Interest | craft         |
| Gene Ontology                            | craft         |
| Cell Ontology                            | craft         |
| DNA                                      | jnlpba        |
| Cell Type                                | jnlpba        |
| Cell Line                                | jnlpba        |
| RNA                                      | jnlpba        |
| Protein                                  | jnlpba        |
| Disease Names                            | bc5cdr        |
| Chemicals Names                          | bc5cdr        |
| Amino Acids                              | bionlp13cg    |
| Anatomical Systems                       | bionlp13cg    |
| Cancer                                   | bionlp13cg    |
| Cell                                     | bionlp13cg    |
| Cellular Components                      | bionlp13cg    |
| Developing Anatomical Structure          | bionlp13cg    |
| Gene or Gene Product                     | bionlp13cg    |
| Immaterial Anatomical Entity             | bionlp13cg    |
| Multi-tissue Structure                   | bionlp13cg    |
| Organ                                    | bionlp13cg    |
| Organism                                 | bionlp13cg    |
| Organism Subdivision                     | bionlp13cg    |
| Organism Substance                       | bionlp13cg    |
| Pathological Formation                   | bionlp13cg    |
| Simple Chemical                          | bionlp13cg    |

| Tissue | bionlp13cg |
|--------|------------|
|--------|------------|

**Table S2: Biomedical information extraction-based features extracted by MetaMap.**

| <b>Features</b> | <b>Full Names</b>                       |
|-----------------|-----------------------------------------|
| <b>aapp</b>     | Amino Acid, Peptide, or Protein         |
| <b>acab</b>     | Acquired Abnormality                    |
| <b>acty</b>     | Activity                                |
| <b>aggp</b>     | Age Group                               |
| <b>amas</b>     | Amino Acid Sequence                     |
| <b>amph</b>     | Amphibian                               |
| <b>anab</b>     | Anatomical Abnormality                  |
| <b>anim</b>     | Animal                                  |
| <b>anst</b>     | Anatomical Structure                    |
| <b>antb</b>     | Antibiotic                              |
| <b>arch</b>     | Archaeon                                |
| <b>bacs</b>     | Biologically Active Substance           |
| <b>bact</b>     | Bacterium                               |
| <b>bdsu</b>     | Body Substance                          |
| <b>bdsy</b>     | Body System                             |
| <b>bhvr</b>     | Behavior                                |
| <b>biof</b>     | Biologic Function                       |
| <b>bird</b>     | Bird                                    |
| <b>blor</b>     | Body Location or Region                 |
| <b>bmod</b>     | Biomedical Occupation or<br>Discipline  |
| <b>bodm</b>     | Biomedical or Dental Material           |
| <b>bpoc</b>     | Body Part, Organ, or Organ<br>Component |
| <b>bsoj</b>     | Body Space or Junction                  |
| <b>celc</b>     | Cell Component                          |
| <b>celf</b>     | Cell Function                           |
| <b>cell</b>     | Cell                                    |

|             |                                      |
|-------------|--------------------------------------|
| <b>cgab</b> | Congenital Abnormality               |
| <b>chem</b> | Chemical                             |
| <b>chvf</b> | Chemical Viewed Functionally         |
| <b>chvs</b> | Chemical Viewed Structurally         |
| <b>clas</b> | Classification                       |
| <b>clna</b> | Clinical Attribute                   |
| <b>clnd</b> | Clinical Drug                        |
| <b>cnce</b> | Conceptual Entity                    |
| <b>comd</b> | Cell or Molecular Dysfunction        |
| <b>crbs</b> | Carbohydrate Sequence                |
| <b>diap</b> | Diagnostic Procedure                 |
| <b>dora</b> | Daily or Recreational Activity       |
| <b>drdd</b> | Drug Delivery Device                 |
| <b>dsyn</b> | Disease or Syndrome                  |
| <b>edac</b> | Educational Activity                 |
| <b>eehu</b> | Environmental Effect of<br>Humans    |
| <b>elii</b> | Element, Ion, or Isotope             |
| <b>emod</b> | Experimental Model of Disease        |
| <b>emst</b> | Embryonic Structure                  |
| <b>enty</b> | Entity                               |
| <b>enzy</b> | Enzyme                               |
| <b>euka</b> | Eukaryote                            |
| <b>evnt</b> | Event                                |
| <b>famg</b> | Family Group                         |
| <b>ffas</b> | Fully Formed Anatomical<br>Structure |
| <b>fish</b> | Fish                                 |
| <b>fndg</b> | Finding                              |
| <b>fngs</b> | Fungus                               |
| <b>food</b> | Food                                 |

|             |                                       |
|-------------|---------------------------------------|
| <b>ftcn</b> | Functional Concept                    |
| <b>genf</b> | Genetic Function                      |
| <b>geoa</b> | Geographic Area                       |
| <b>gngm</b> | Gene or Genome                        |
| <b>gora</b> | Governmental or Regulatory Activity   |
| <b>grpa</b> | Group Attribute                       |
| <b>grup</b> | Group                                 |
| <b>hcpp</b> | Human-caused Phenomenon or Process    |
| <b>hcro</b> | Health Care Related Organization      |
| <b>hlcs</b> | Health Care Activity                  |
| <b>hops</b> | Hazardous or Poisonous Substance      |
| <b>horm</b> | Hormone                               |
| <b>humn</b> | Human                                 |
| <b>idcn</b> | Idea or Concept                       |
| <b>imft</b> | Immunologic Factor                    |
| <b>inbe</b> | Individual Behavior                   |
| <b>inch</b> | Inorganic Chemical                    |
| <b>inpo</b> | Injury or Poisoning                   |
| <b>inpr</b> | Intellectual Product                  |
| <b>irda</b> | Indicator, Reagent, or Diagnostic Aid |
| <b>lang</b> | Language                              |
| <b>lbpr</b> | Laboratory Procedure                  |
| <b>lbtr</b> | Laboratory or Test Result             |
| <b>mamm</b> | Mammal                                |
| <b>mbrt</b> | Molecular Biology Research Technique  |

|             |                                            |
|-------------|--------------------------------------------|
| <b>mcha</b> | Machine Activity                           |
| <b>medd</b> | Medical Device                             |
| <b>menp</b> | Mental Process                             |
| <b>mnob</b> | Manufactured Object                        |
| <b>mobd</b> | Mental or Behavioral<br>Dysfunction        |
| <b>moft</b> | Molecular Function                         |
| <b>mosq</b> | Molecular Sequence                         |
| <b>neop</b> | Neoplastic Process                         |
| <b>nnon</b> | Nucleic Acid, Nucleoside, or<br>Nucleotide |
| <b>npop</b> | Natural Phenomenon or Process              |
| <b>nusq</b> | Nucleotide Sequence                        |
| <b>ocac</b> | Occupational Activity                      |
| <b>ocdi</b> | Occupation or Discipline                   |
| <b>orch</b> | Organic Chemical                           |
| <b>orga</b> | Organism Attribute                         |
| <b>orgf</b> | Organism Function                          |
| <b>orgm</b> | Organism                                   |
| <b>orgt</b> | Organization                               |
| <b>ortf</b> | Organ or Tissue Function                   |
| <b>patf</b> | Pathologic Function                        |
| <b>phob</b> | Physical Object                            |
| <b>phpr</b> | Phenomenon or Process                      |
| <b>phsf</b> | Physiologic Function                       |
| <b>phsu</b> | Pharmacologic Substance                    |
| <b>plnt</b> | Plant                                      |
| <b>podg</b> | Patient or Disabled Group                  |
| <b>popg</b> | Population Group                           |
| <b>prog</b> | Professional or Occupational<br>Group      |

|             |                                        |
|-------------|----------------------------------------|
| <b>pros</b> | Professional Society                   |
| <b>qlco</b> | Qualitative Concept                    |
| <b>qnco</b> | Quantitative Concept                   |
| <b>rcpt</b> | Receptor                               |
| <b>rept</b> | Reptile                                |
| <b>resa</b> | Research Activity                      |
| <b>resd</b> | Research Device                        |
| <b>rnlw</b> | Regulation or Law                      |
| <b>sbst</b> | Substance                              |
| <b>shro</b> | Self-help or Relief Organization       |
| <b>socb</b> | Social Behavior                        |
| <b>sosy</b> | Sign or Symptom                        |
| <b>spco</b> | Spatial Concept                        |
| <b>tisu</b> | Tissue                                 |
| <b>tmco</b> | Temporal Concept                       |
| <b>topp</b> | Therapeutic or Preventive<br>Procedure |
| <b>virs</b> | Virus                                  |
| <b>vita</b> | Vitamin                                |
| <b>vtbt</b> | Vertebrate                             |

**Table S3: Biomedical information extraction-based features extracted by spaCy customized model.**

| Features                |
|-------------------------|
| Pathogen                |
| Medical Condition names |
| Medicine names          |

**Table S4: Named-entity recognition features.**

| Features     |
|--------------|
| Person       |
| FAC          |
| GPE          |
| Product      |
| Work of art  |
| Language     |
| Time         |
| Money        |
| Cardinal     |
| NORP         |
| Organization |
| Location     |
| Event        |
| Law          |
| Date         |
| Percent      |
| Quantity     |
| Ordinal      |



**Table S5: Linguistic features.**

| <b>Features</b>                 |
|---------------------------------|
| Num of stopwords                |
| Num of @                        |
| Num of numeric values           |
| Num of lowercase characters     |
| Text language                   |
| Character count                 |
| Average word length             |
| Num of ?                        |
| Num of /                        |
| Num of #                        |
| Num of uppercase characters     |
| Num of all uppercase characters |
| Word count                      |
| Sentence count                  |
| Average sentence length         |

**Table S6: Sentiment Features.**

| <b>Features</b>          |
|--------------------------|
| Positive sentiment score |
| Negative sentiment score |
| Neutral sentiment score  |
| Compound sentiment score |
| Text polarity            |
